# Supplementary material for: Full color-emitting (Y,Tb,Eu)NbO4nanophosphors: calcination-assisted hydrothermal synthesis, energy interaction, and application in deep UV chip-based WLEDs
Source: Royal Society of Chemistry journal article supplement (doi:10.1039/d0tc04098c), 2020-01-01
Supplement: d0tc04098c1.pdf [file d0tc04098c1.pdf]

## Supplementary information

### **Full color-emitting (Y,Tb,Eu)NbO<sub>4</sub> nanophosphors: calcination-assisted hydrothermal synthesis, energy interaction, and application in deep UV chip-based WLEDs**

Zhihao Wang,<sup>a</sup> Qinghong Meng,<sup>b</sup> Chunyun Wang,<sup>c</sup> Dianyuan Fan,<sup>a</sup> Yu Wang,<sup>a,\*</sup>

<sup>a</sup> *SZU-NUS Collaborative Innovation Center for Optoelectronic Science & Technology, International Collaborative Laboratory of 2D Materials for Optoelectronics Science and Technology of Ministry of Education, Institute of Microscale Optoelectronics, Shenzhen University, Shenzhen 518060, China*

<sup>b</sup> *Key Laboratory for Anisotropy and Texture of Materials (Ministry of Education), School of Materials Science and Engineering, Northeastern University, Shenyang 110819, China*

<sup>c</sup> *Tsinghua-Berkeley Shenzhen Institute (TBSI), Tsinghua Shenzhen International Graduate School, Tsinghua University, Shenzhen 518055, China*

\*Corresponding author

Dr. Yu Wang

Shenzhen University, China

Tel: +86-13530226127

E-mail: [wangyu@szu.edu.cn](mailto:wangyu@szu.edu.cn)

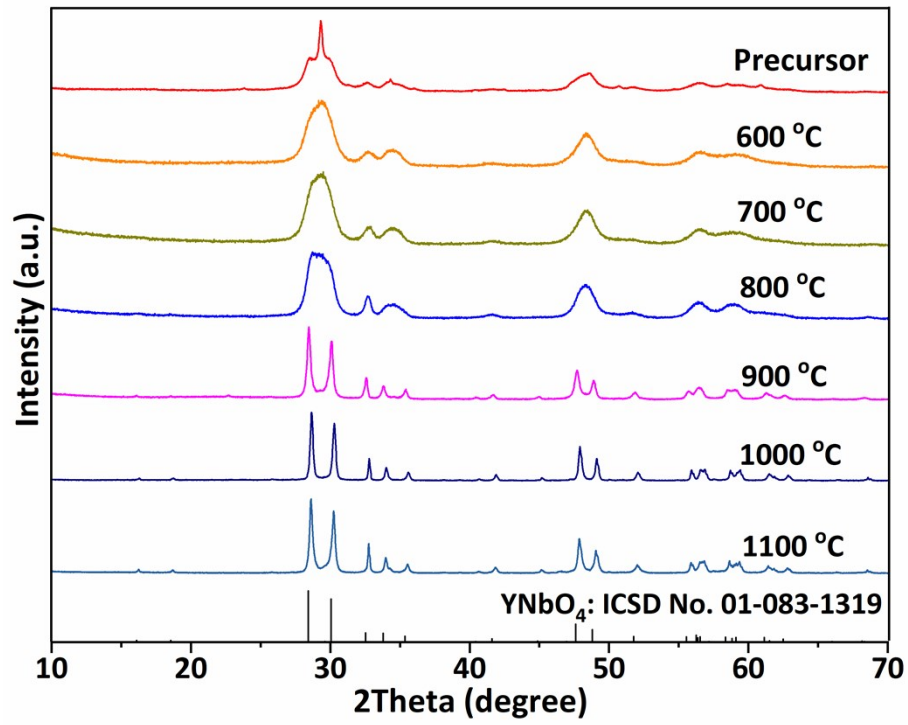

**Fig. S1** XRD patterns of the hydrothermally crystallized  $\text{YNbO}_4$  precursor and its products calcined at various temperatures.

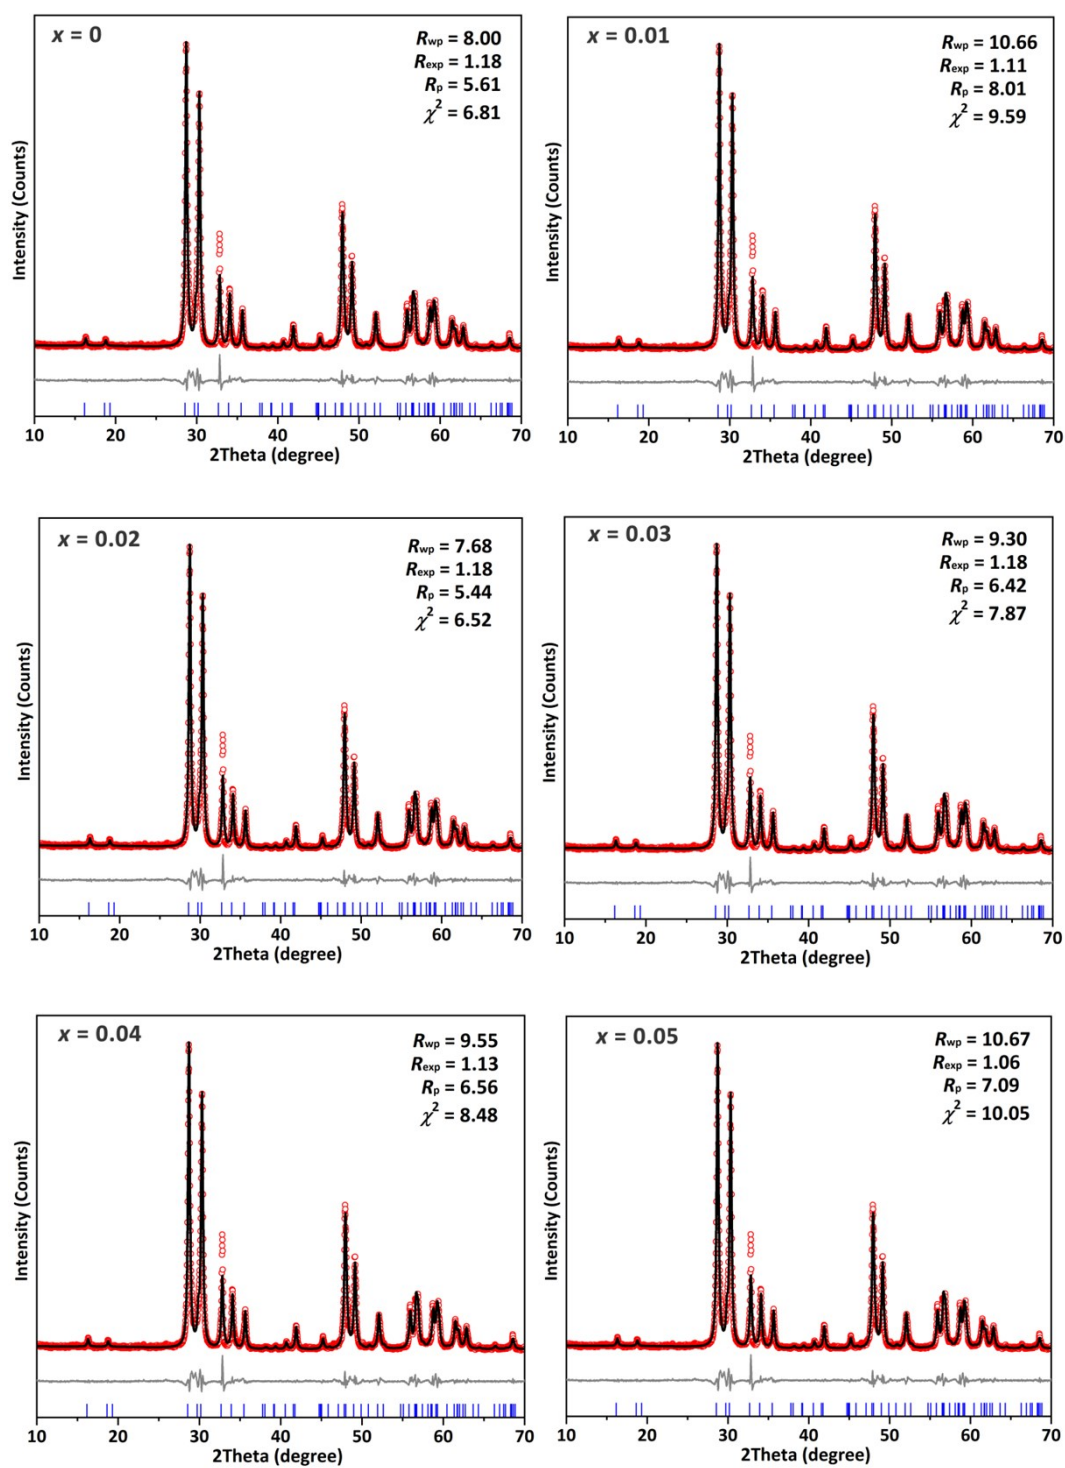

Fig. S2 Rietveld refinements of the  $(Y_{1-x}Tb_x)NbO_4$  samples obtained after 1000 °C calcination.

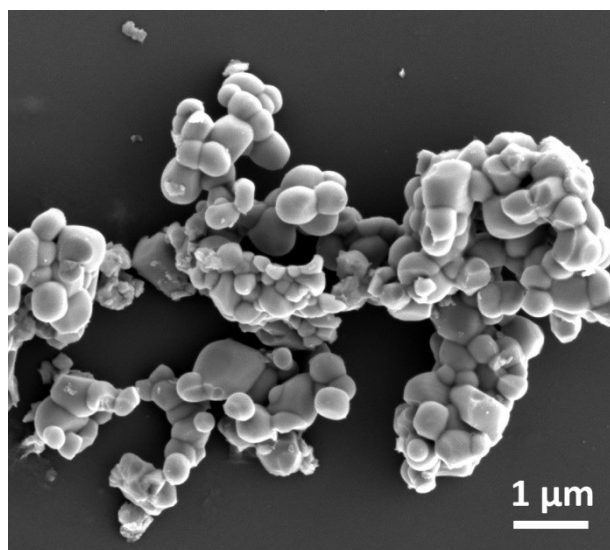

**Fig. S3** SEM morphology of the YNbO<sub>4</sub> sample obtained after 1100 °C calcination.

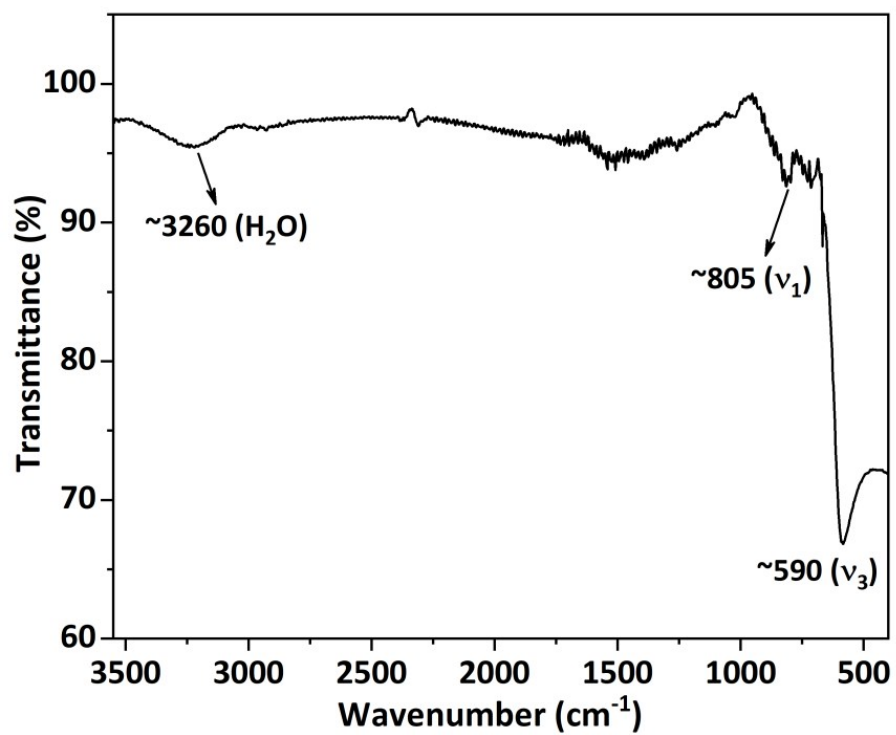

Fig. S4 FT-IR spectrum of the hydrothermal crystallized YNbO<sub>4</sub>.

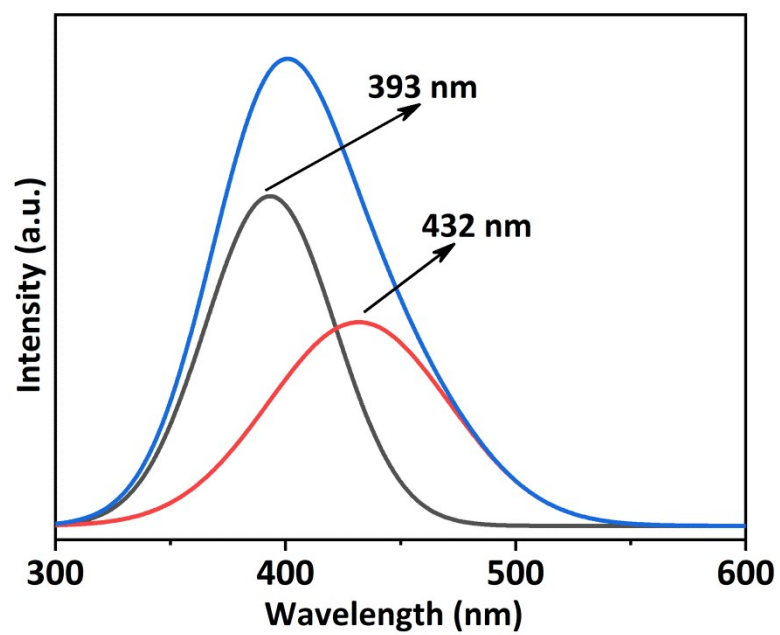

**Fig. S5** Deconvolution of the 401 nm emission peak by Gaussian fitting for YNbO<sub>4</sub>.

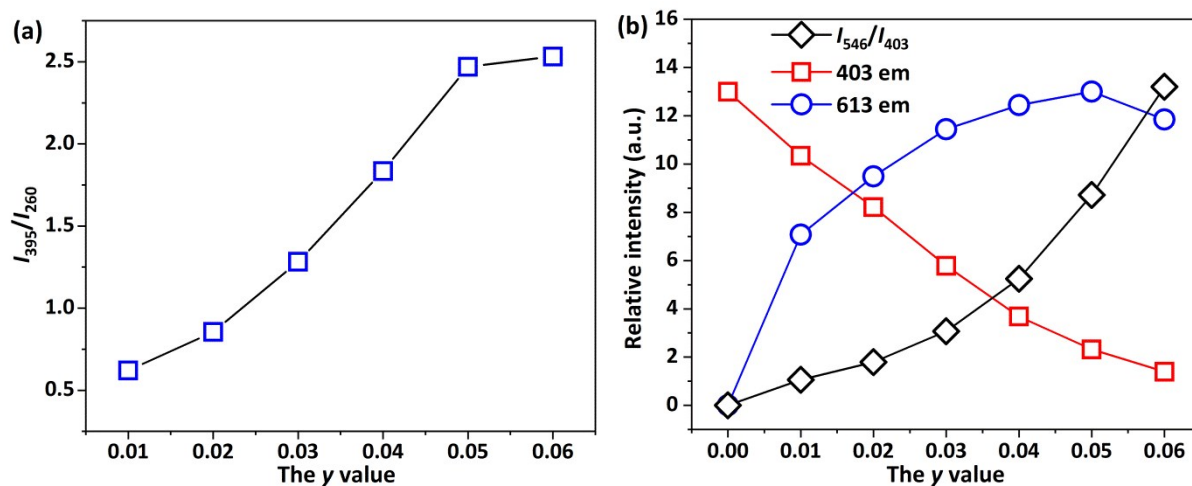

**Fig. S6** The  $I_{395}/I_{260}$  intensity ratios (a) and the relative emission intensities of  $NbO_4^{3-}$  (403 nm) and  $Eu^{3+}$  (613 nm) and the  $I_{613}/I_{403}$  intensity ratios (b) of the  $(Y_{1-y}Eu_y)NbO_4$  ( $y = 0-0.06$ ) phosphors, as a function of the y value.

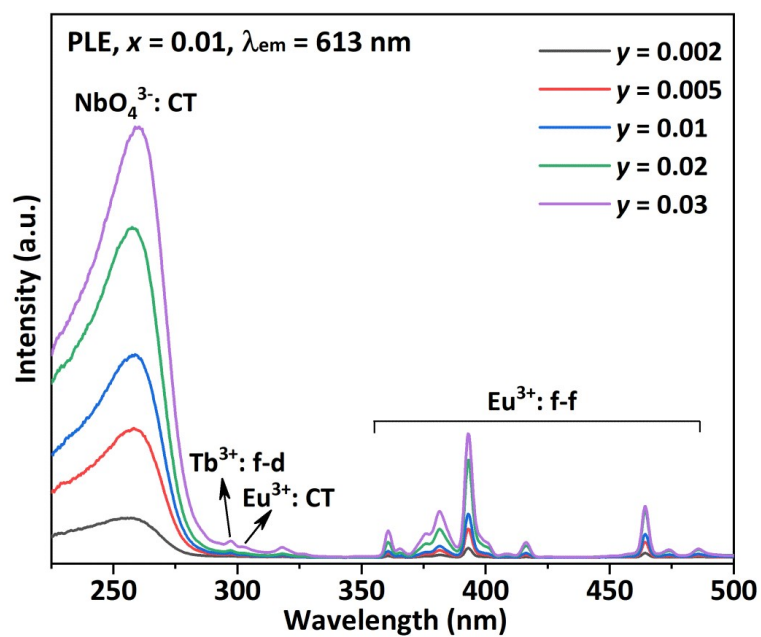

Fig. S7 PLE spectra of the  $(\text{Y}_{0.99-y}\text{Tb}_{0.01}\text{Eu}_y)\text{NbO}_4$  phosphors.



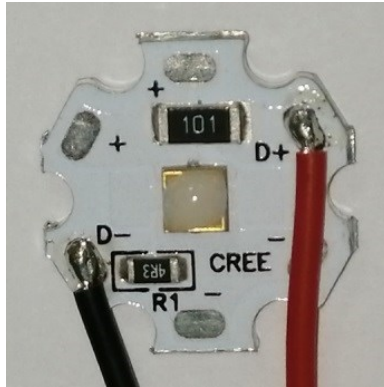

**Fig. S8** Appearance of the as-fabricated 275 nm UV chip-based pc-WLED.

**Table S1** Optical properties of the as-fabricated pc-WLED.

| Driving current (mA)     |   | 50    | 60    | 70    | 80    |
|--------------------------|---|-------|-------|-------|-------|
| CIE                      | X | 0.337 | 0.325 | 0.312 | 0.291 |
|                          | Y | 0.340 | 0.338 | 0.323 | 0.306 |
| CCT (K)                  |   | 5517  | 5934  | 6317  | 6976  |
| CRI                      |   | 86.7  | 83.4  | 78.9  | 73.0  |
| Luminous efficacy (lm/W) |   | 10.77 | 12.31 | 11.71 | 12.02 |
